# Supplementary material for: Thiazolo[5,4-d]thiazole-Based CMPs as Bifunctional Photocatalysts for H₂O₂ Production and Organic Pollutant Degradation
Source: Research Square preprint supplement (doi:10.21203/rs.3.rs-7940600/v1), 2025-11-24
Supplement: Supplementary file 1 [file 7f032d8d3b2dd4790c5010c4.docx]

**Thiazolo[5,4-*d*]thiazole-Based CMPs as Bifunctional Photocatalysts for H₂O₂ Production and Organic Pollutant Degradation**

Yuting Ren, Mingyue Wang, Shuangjie Zhang, Chunhua Yuan, Jianmei Zhou, Dongmei Li*, Zhongzhen Tian*

Inner Mongolia Key Laboratory of Coal Chemical Engineering and Comprehensive Utilization, School of Chemistry and Chemical Engineering, Inner Mongolia University of Science & Technology, Baotou 014010, China

Corresponding E-mail: 2019951@imust.edu.cn Tel: +86 15047405248

2019952@imust.edu.cn Tel: +86 15044988327

Address: No. 7, Alding Street, Baotou 014010, Inner Mongolia, China

1. **H2O2 standard curve**

The standard curve of H2O2 was determined by iodometric method. First, 1.66 g of potassium iodide (KI) and 1.24 g of ammonium molybdate, tetrahydrate （(NH4)6Mo7O24·4H2O） were weighed into 100 mL volumetric flasks, respectively. Then, deionized water was added to them to fix the volume and this was used as a color developer. Five 250 mL volumetric flasks were prepared and configured with concentration gradients of 0 µM, 50 µM, 150 µM, 250 µM and 350 µM of H2O2 solution. 1.00 mL of solution was sampled from each volumetric flask with different H2O2 concentration gradients into the corresponding colorimetric tubes. Then, 2.00 mL of potassium iodide solution (0.10 mol L-1) and 50.0 µL of ammonium molybdate solution (0.01 mol L-1) were added to each cuvette and left to stand for 10 min. Finally, the reaction solution was poured into the cuvettes and placed in a UV-Vis spectrophotometer to measure the absorbance. The absorbance at 351 nm was analyzed for different concentrations of the solution, and the concentration-absorbance standard curve was plotted. The resulting absorbance curves for different concentrations of H2O2 and the corresponding standard curves are shown in Figure S1.


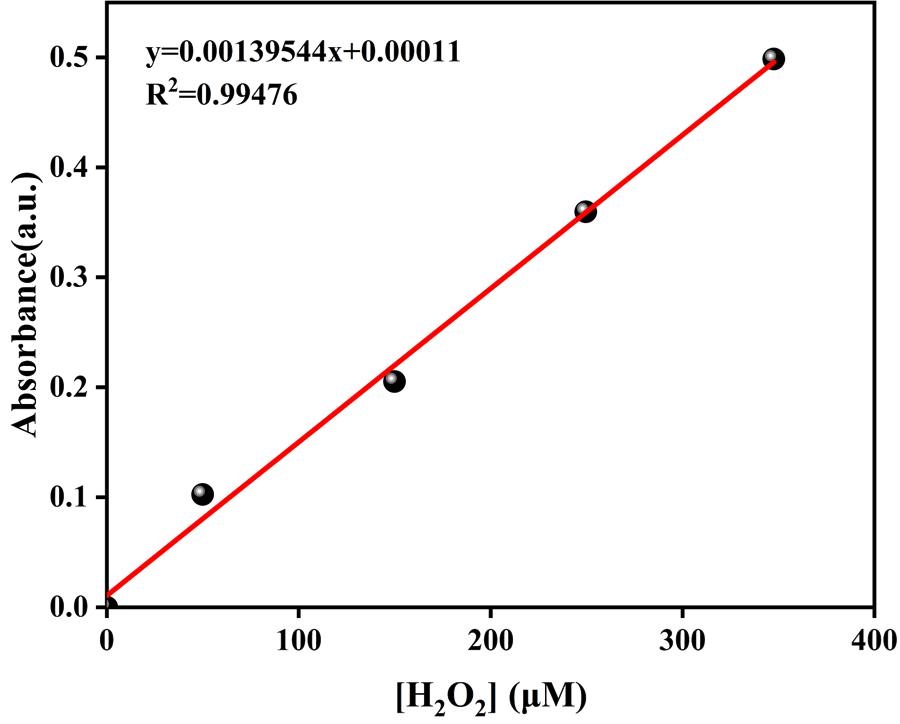


**Figure S1.** Fitting curve of absorbance and concentration at 351 nm.

1. **Apparent Quantum Yield (AQY) measurement**

In this study, the H2O2 yields of the samples were determined under monochromatic light (λ=380 nm, 435 nm and 578 nm) irradiation for 60 min. Then, the apparent quantum yields of the samples under different monochromatic lights were calculated using the following equation:

where n is the amount of H2O2 molecules (mol), NA is Avogadro's constant (6.022 × 1023 mol-1), h is Planck's constant (6.626 × 10-34 J·S), c is the speed of light (3 × 108 m s-1), S is the irradiated area，P is the irradiated light intensity (100 mW cm-2), t is the light time (3600 s), and λ is the wavelength of monochromatic light (m).

1. **Figures ang legends**


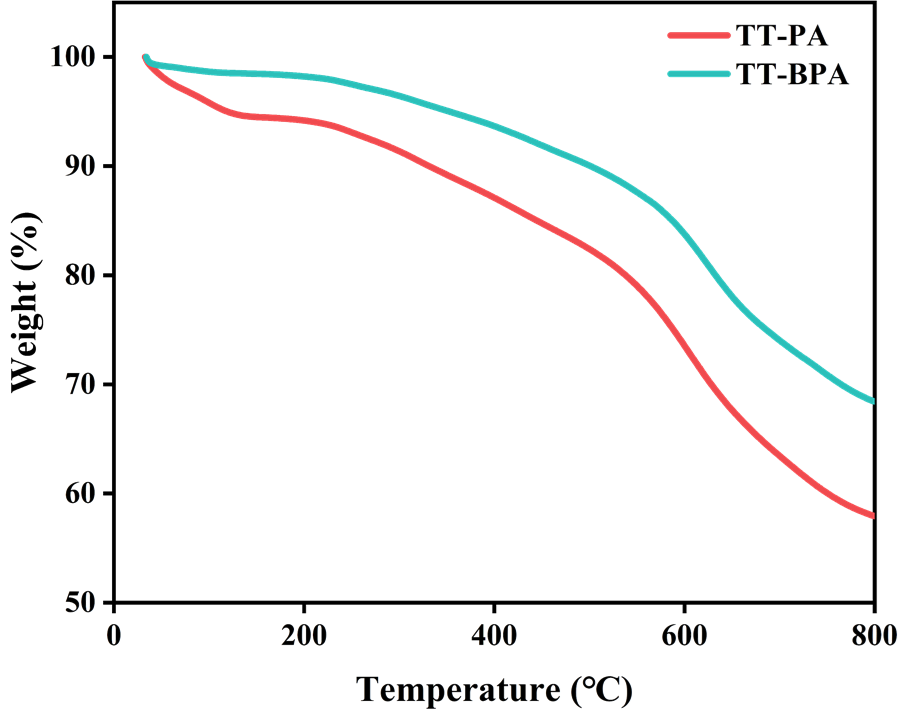


**Figure S2.** The thermogravimetric analysis (TGA) curve of TT-PA and TT-BPA.


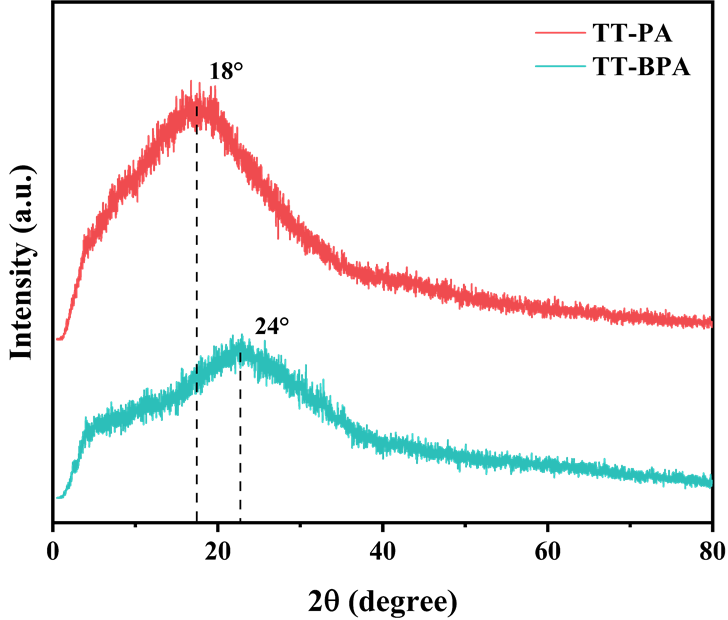


**Figure S3.** Powder X-ray diffraction profiles of TT-PA and TT-BPA.

**
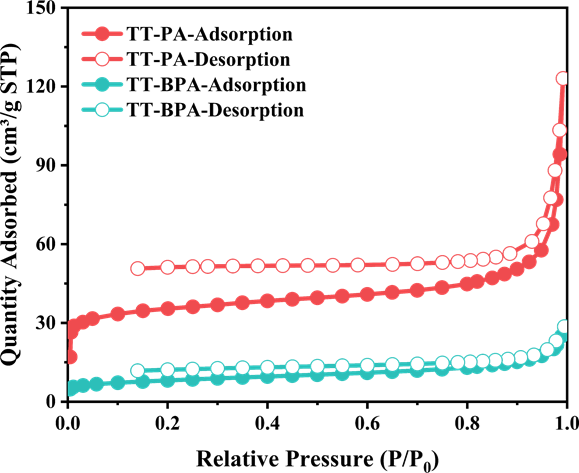
**

**Figure S4.** N2 absorption-desorption isotherms of TT-PA and TT-BPA.


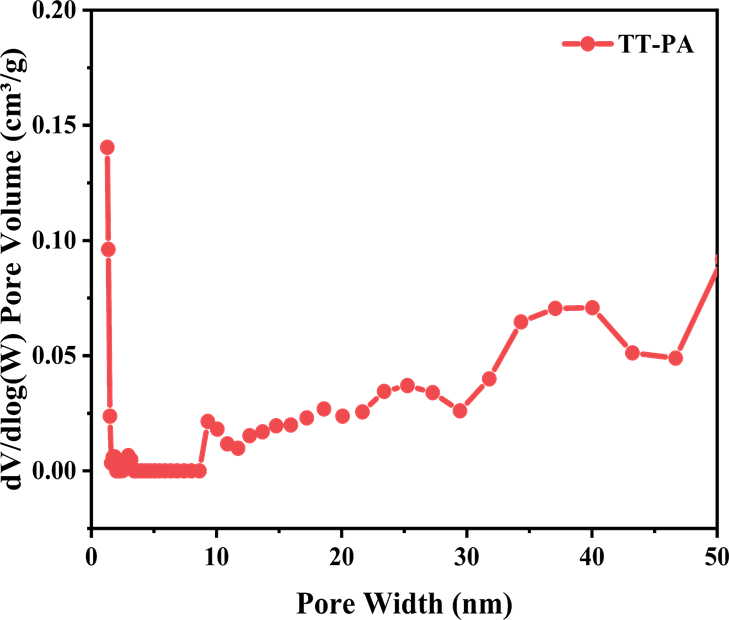


**Figure S5.** Pore size distribution of TT-PA.


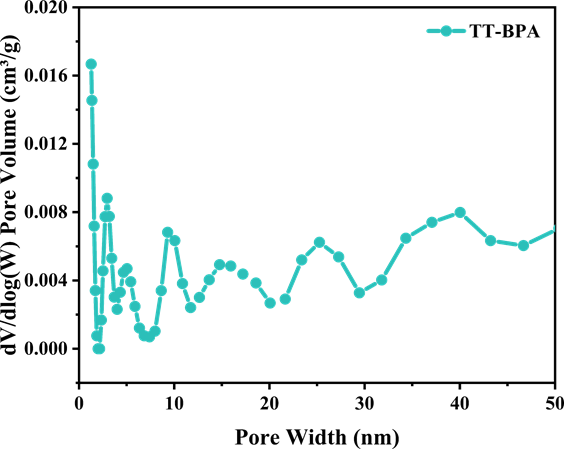


**Figure S6.** Pore size distribution of TT-BPA.


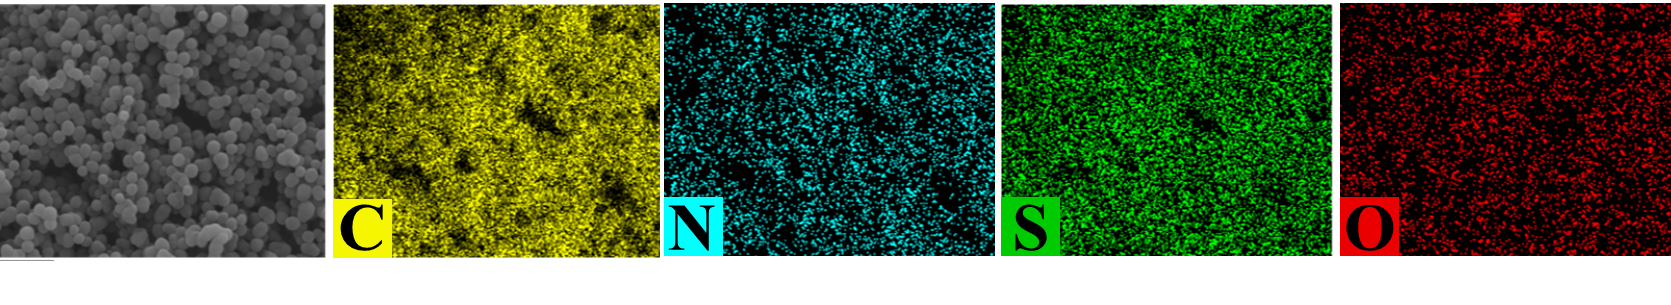


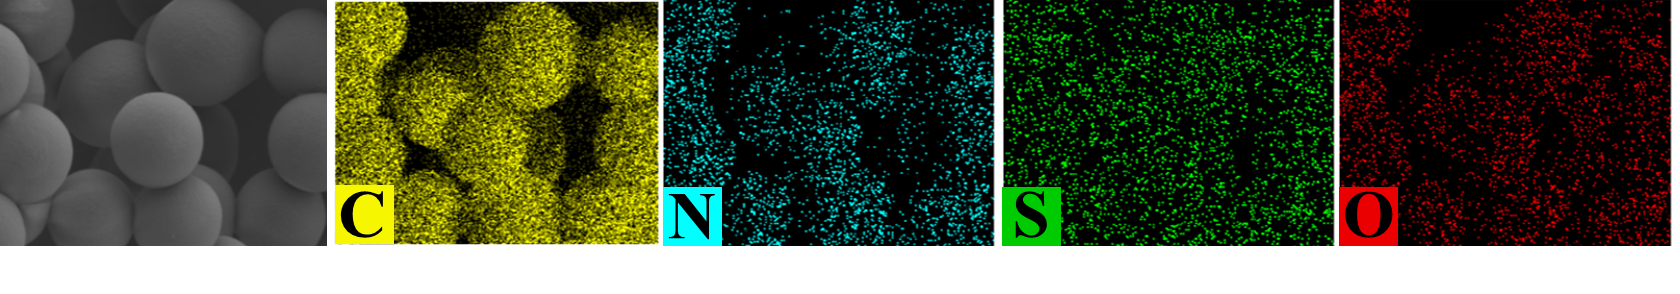


**Figure S7**. Elemental mapping shows the contents of C, O, N, and S for TT-PA and TT-BPA.


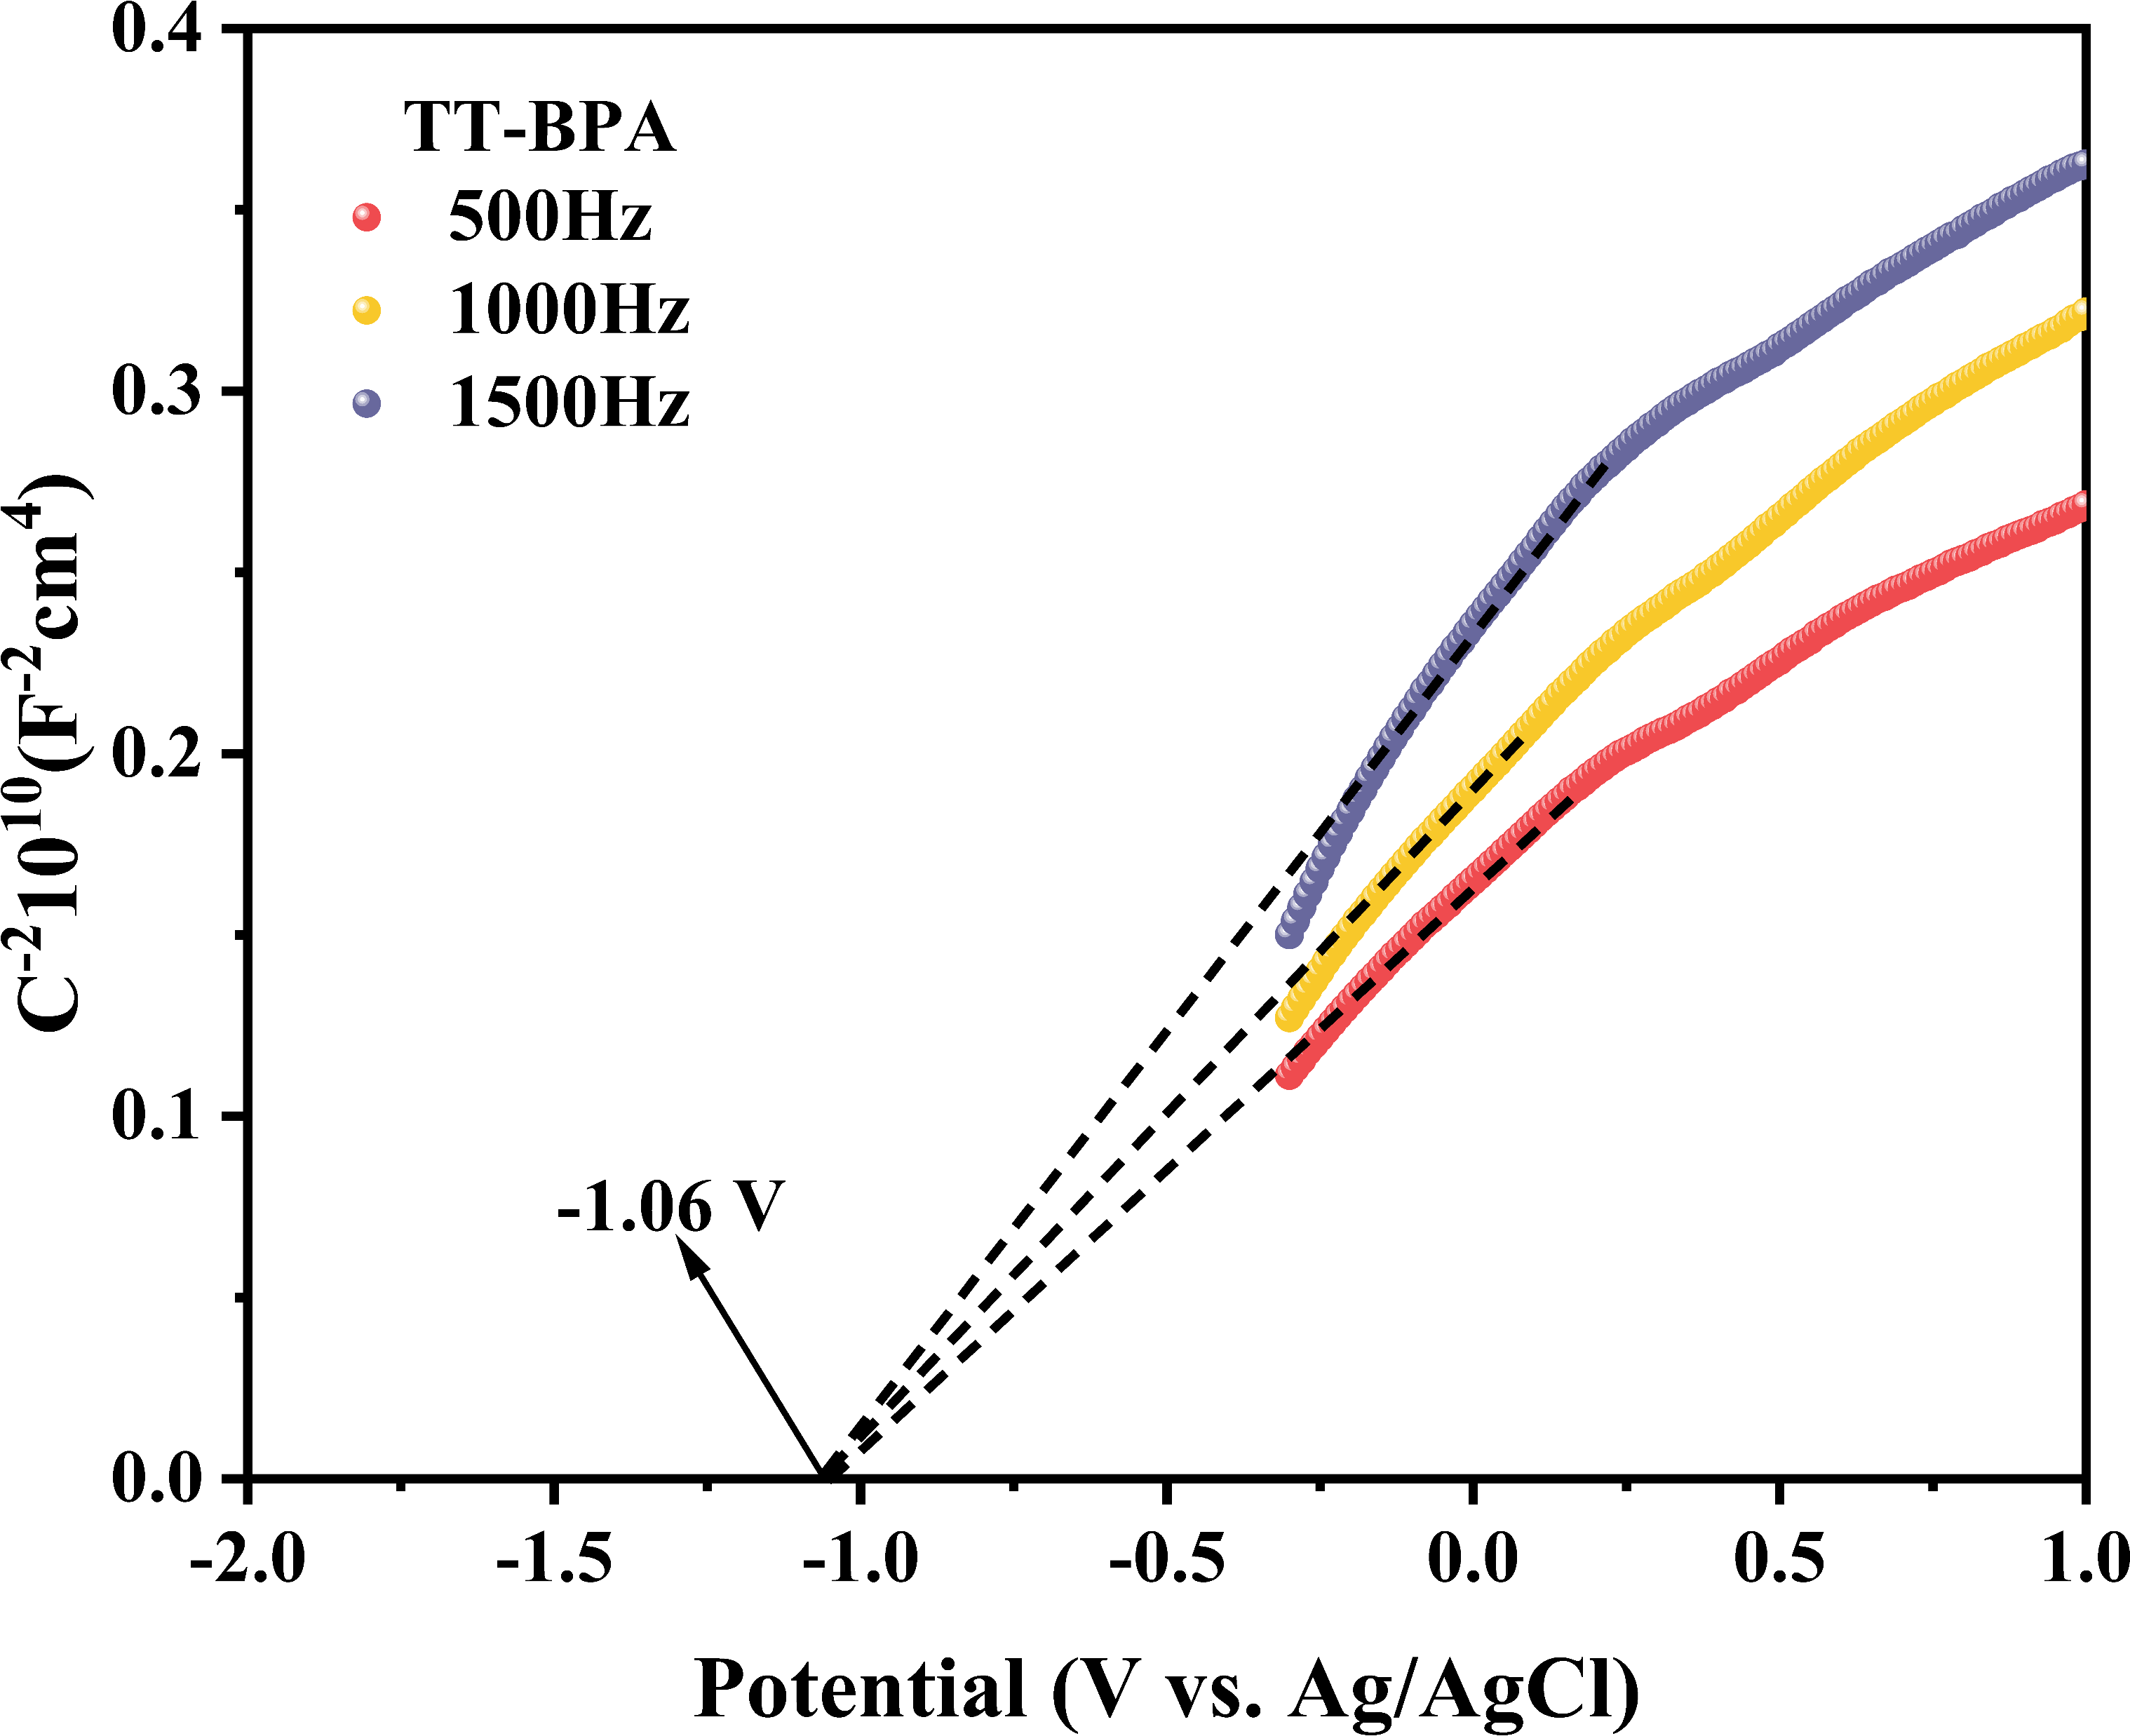


**Figure S8**. Mott–Schottky plots of TT-BPA.

**
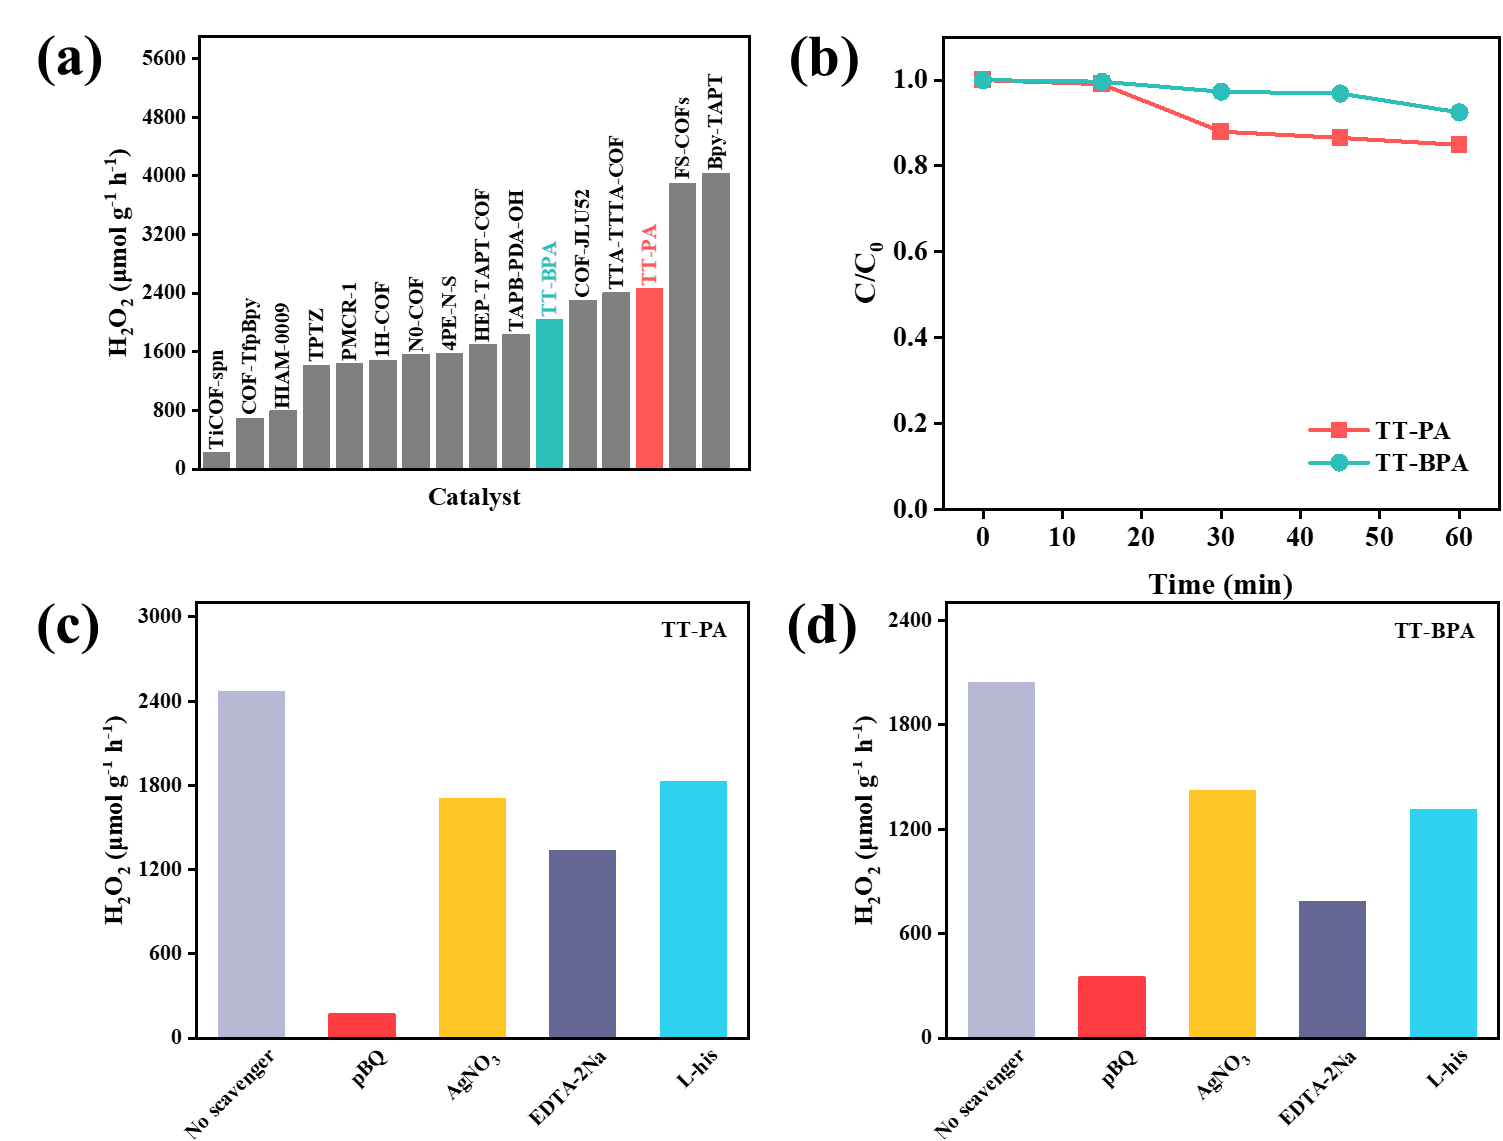
**

**Figure S9.** (a) Performance comparison of TT-PA and TT-BPA with other reported photocatalysts. (Table S2). (b) Comparison of the decomposition properties of TT-PA and TT-BPA. (c, d) Active species capture experiment of photocatalytic generation of H2O2.


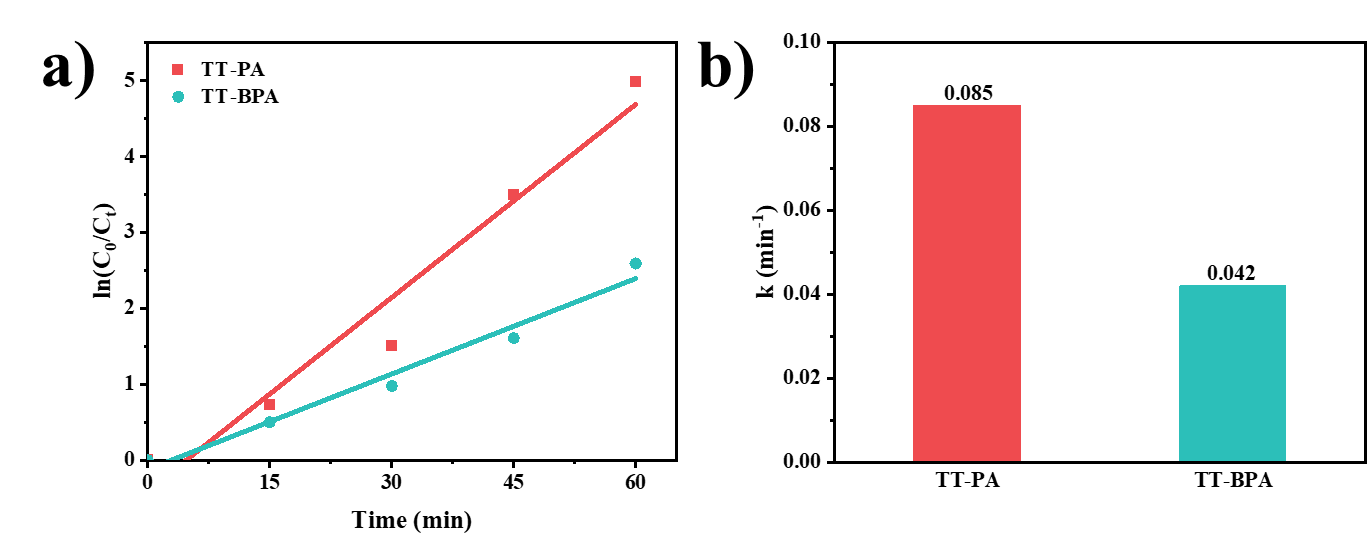


**Figure S10.** Degradation of RhB kinetic curves.


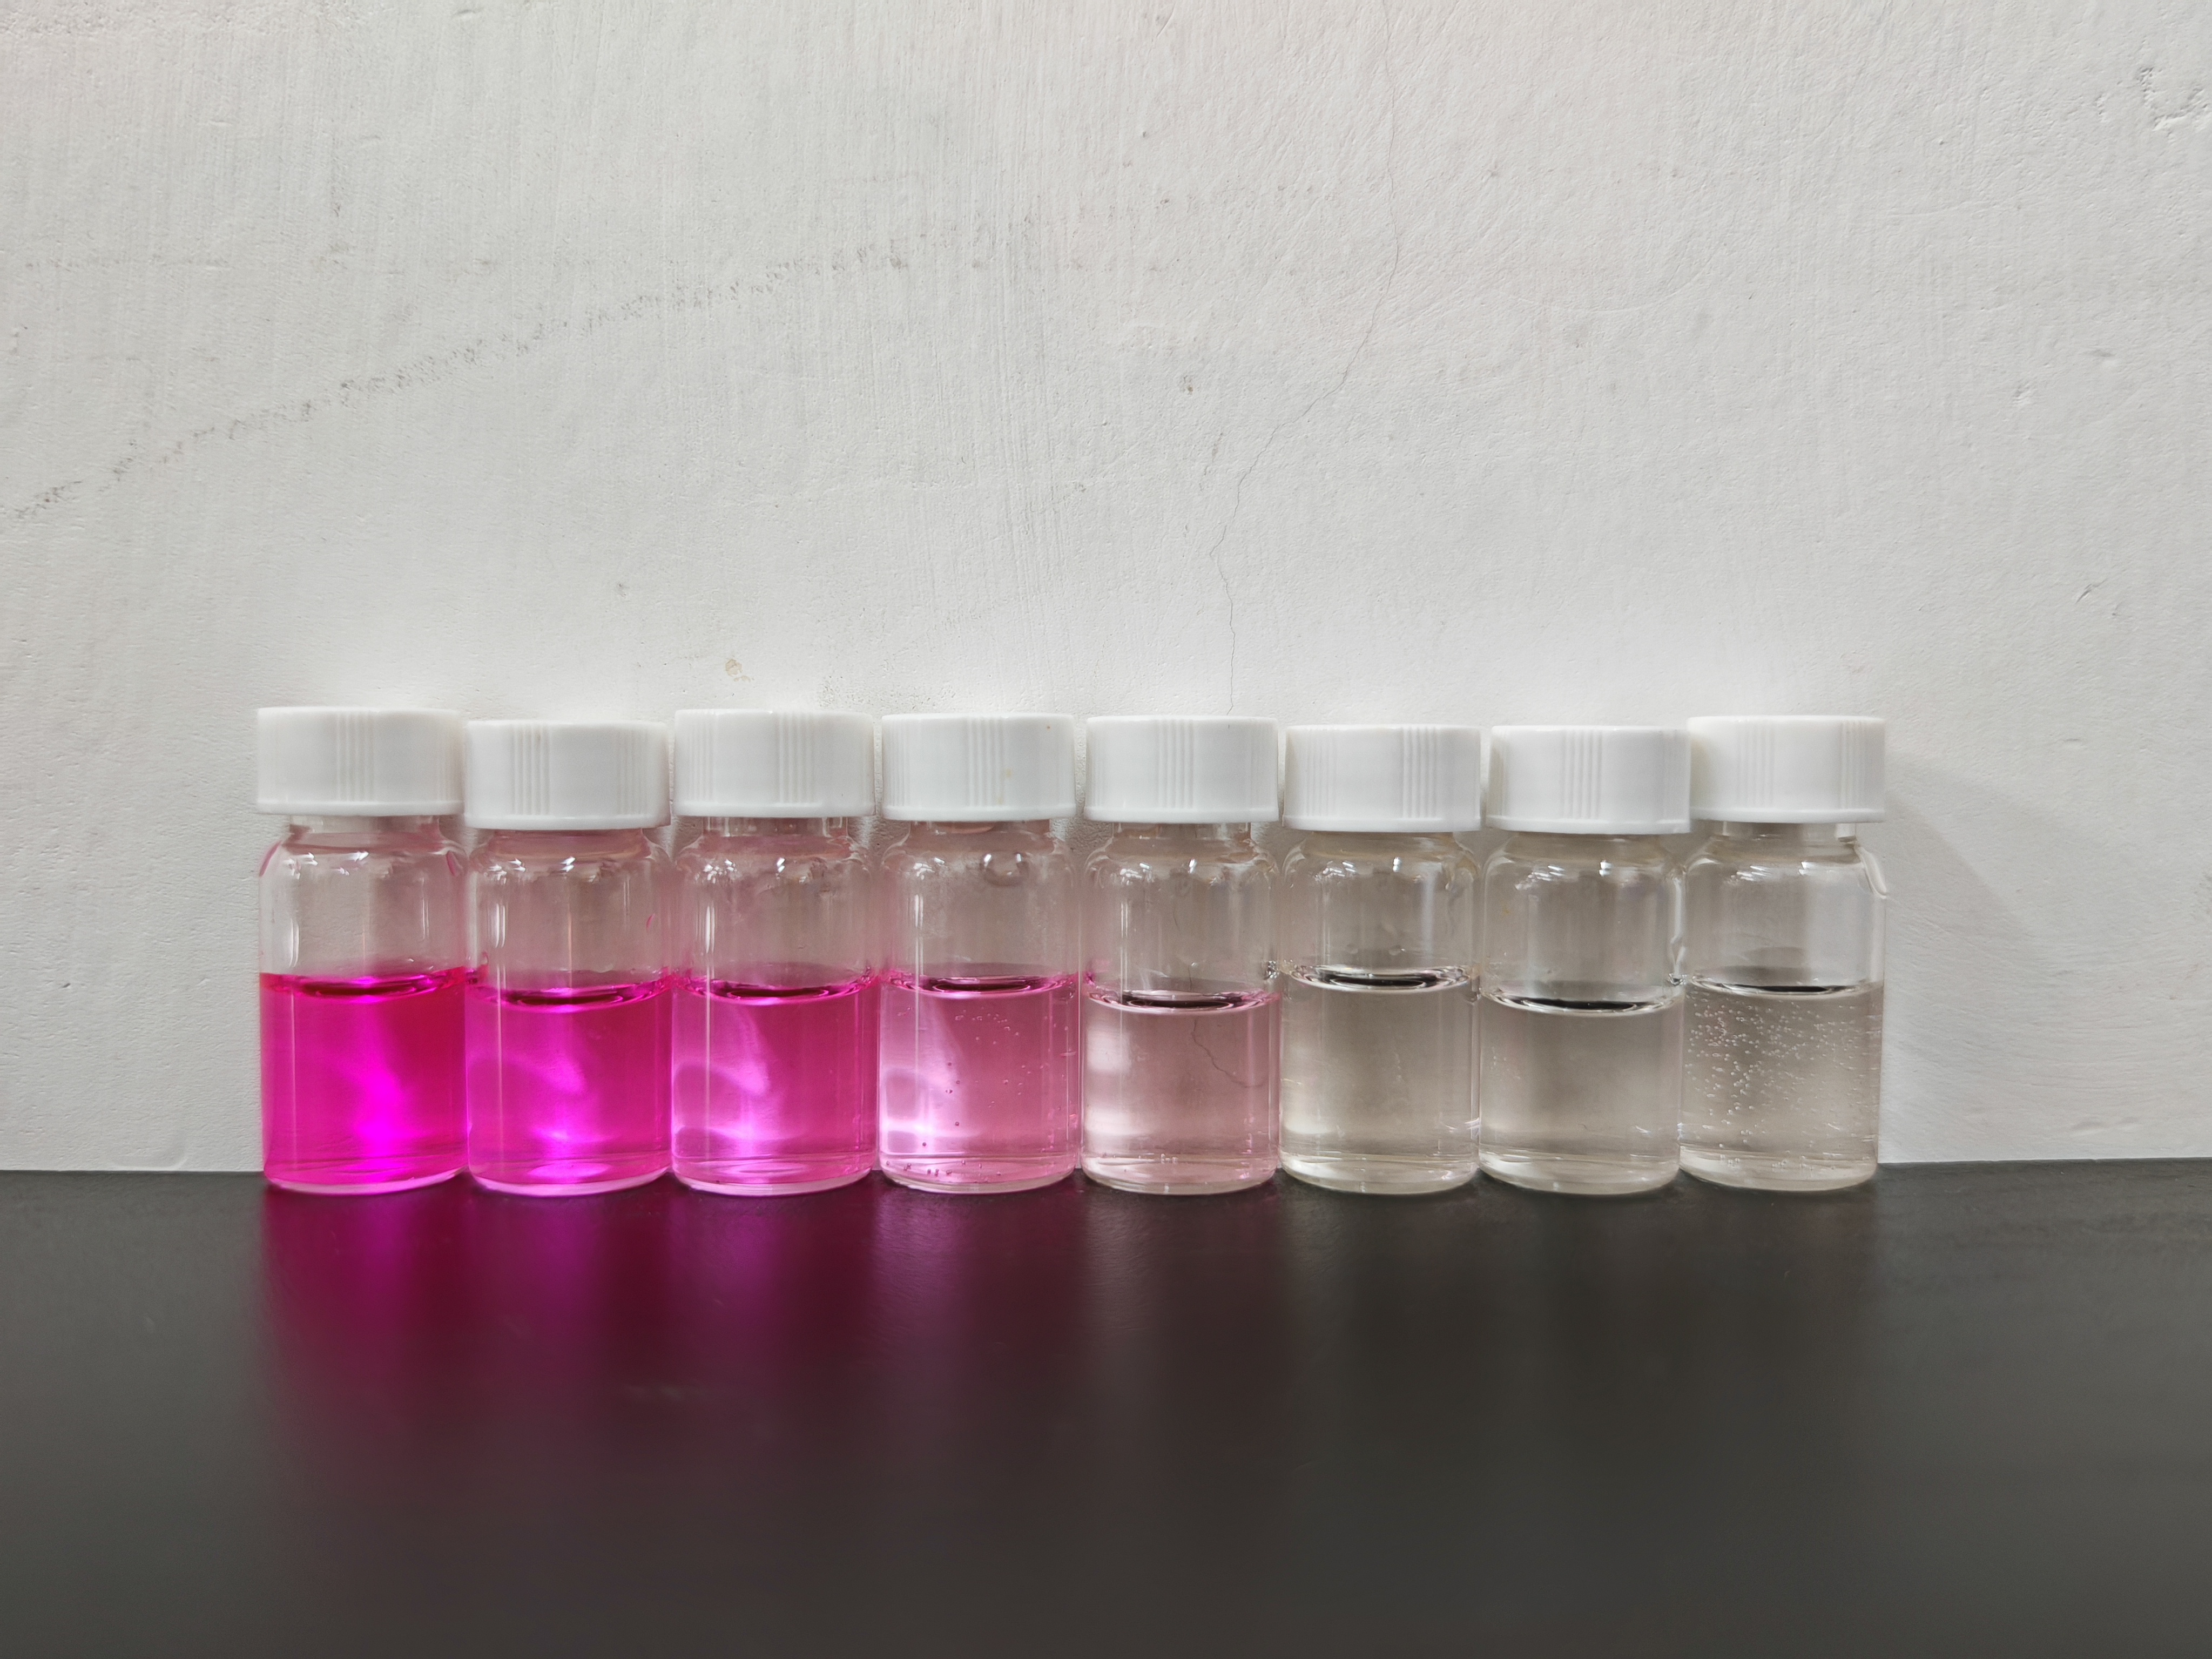


**Figure S11.** Color comparison of RhB degradation by photocatalysts(0min-105min).


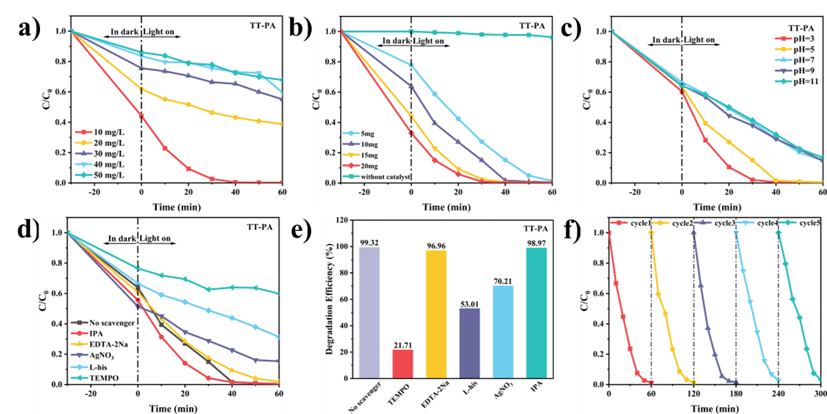


**Figure S12.** Photocatalytic degradation of RhB by TT-PA under visible light irradiation: (a) Different RhB concentrations, (b) Different catalyst qualities, (c) Different pH. (d, e) Effect of different trapping agents on the photocatalytic degradation of RhB (10 mg L-1) by TT-PA (0.3 g L-1). (f) Photocatalytic cycling experiment.


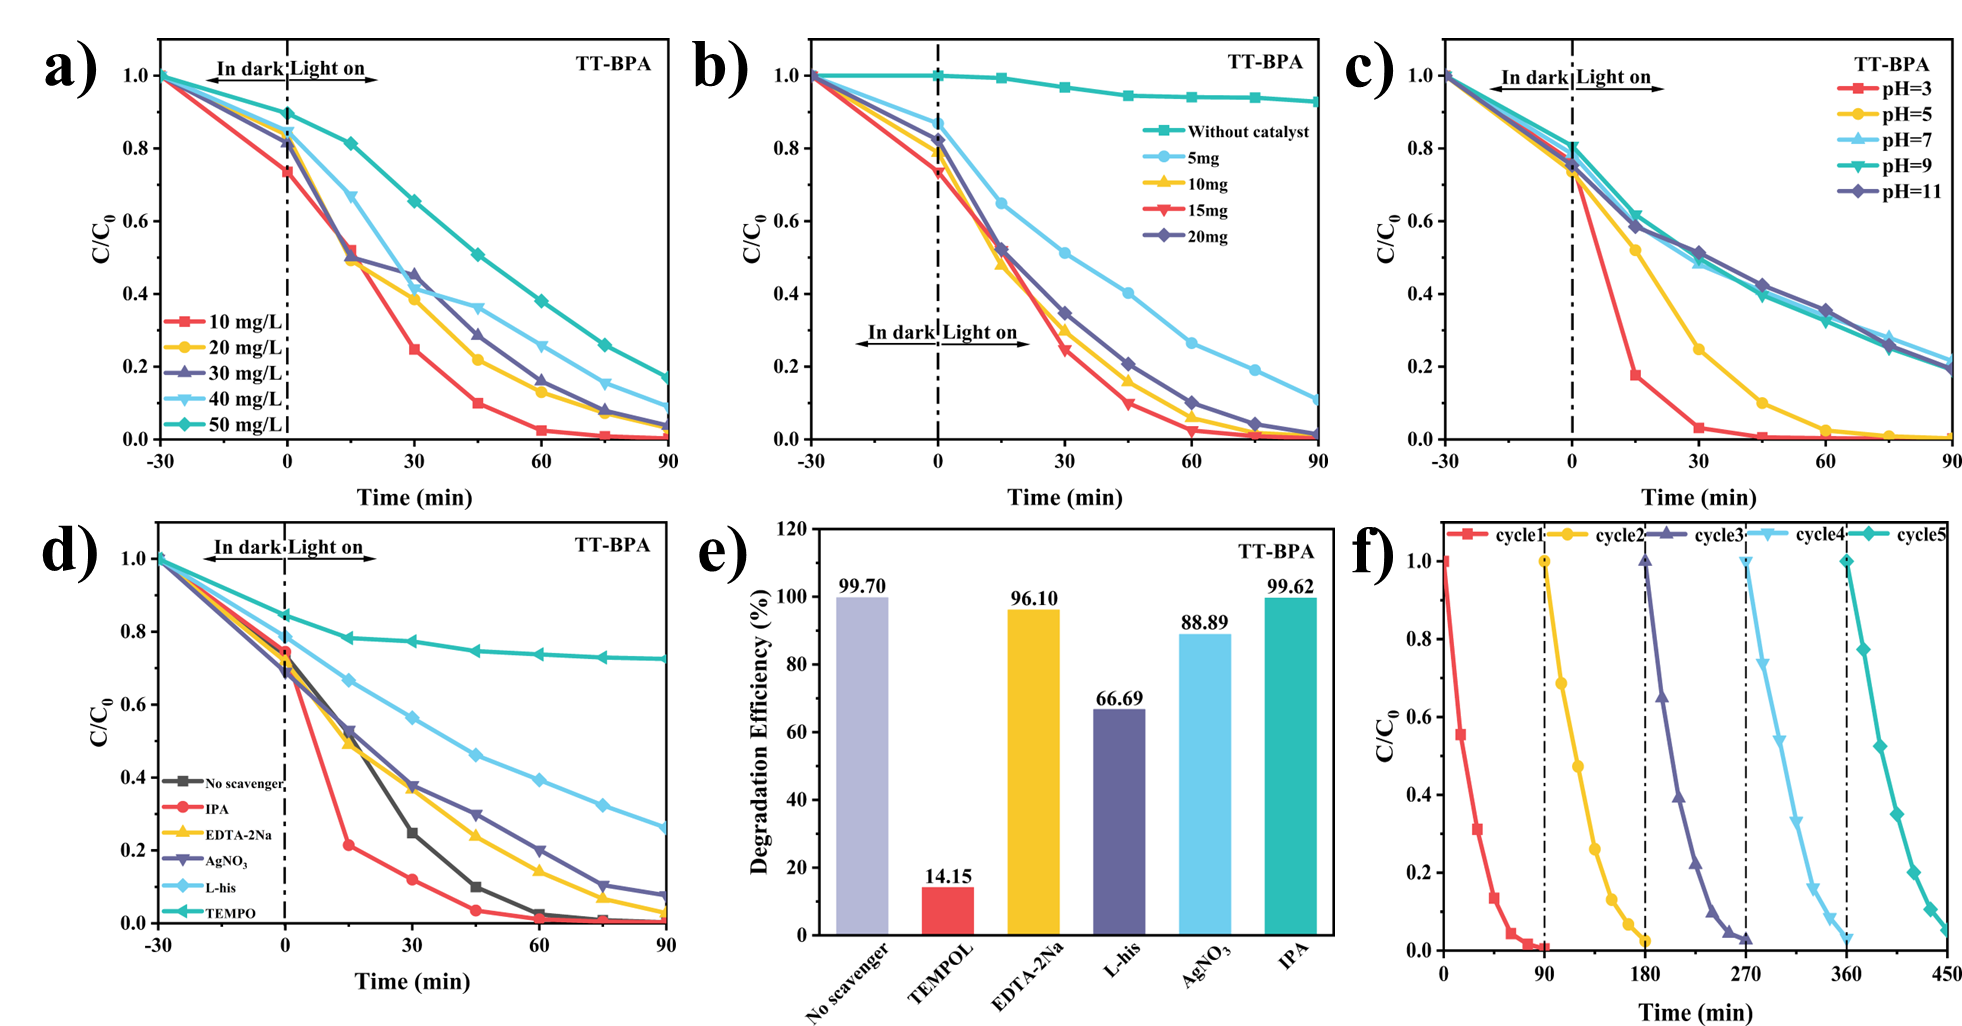


**Figure S13.** Photocatalytic degradation of RhB by TT-BPA under visible light irradiation: (a)Different RhB concentrations. (b)Different catalyst qualities. (c)Different pH. (d, e) Effect of different trapping agents on the photocatalytic degradation of RhB (10 mg L-1) by TT-PA (0.3 g L-1). (f) Photocatalytic cycling experiment.

**Table S1.** Performance of photocatalysts for overall H2O2 photosynthesis.

| Photocatalysts | | Wavelength(nm) | Solvent | H2O2 rate (μmol g-1h-1) | Ref. |
| --- | --- | --- | --- | --- | --- |
| TiCOF-spn | ＞420 | | H2O | 223.55 | [1] |
| COF-TfpBpy | ＞420 | | H2O | 695 | [2] |
| HIAM-0009 | ＞420 | | H2O | 796 | [3] |
| TPTZ | ＞420 | | H2O | 1418 | [4] |
| PMCR-1 | ＞420 | | H2O | 1445 | [5] |
| 1H-COF | ＞420 | | H2O | 1483 | [6] |
| N0-COF | ＞495 | | H2O | 1570 | [7] |
| 4PE-N-S | ＞420 | | H2O | 1574 | [8] |
| HEP-TAPT-COF | ＞420 | | H2O | 1705 | [9] |
| TAPB-PDA-OH | ＞420 | | H2O | 1841.3 | [10] |
| TT-BPA | ＞420 | | H2O | 2041 | This work |
| COF-JLU52 | ＞420 | | H2O | 2301 | [11] |
| TTA-TTTA-COF | | ＞420 | H2O | 2406 | [12] |
| TT-PA | ＞420 | | H2O | 2470 | This work |
| FS-COFs | ＞420 | | H2O | 3904.2 | [13] |
| Bpy-TAPT | ＞420 | | H2O | 4038 | [14] |

**Table S2.** AQY of TT-PA and TT-BPA at different wavelength.

|  | Wavelength(nm) | Light intensity (mW cm-2) | AQY(%) |
| --- | --- | --- | --- |
| TT-PA | 380 | 8.9 | 0.55 |
| 435 | 37.7 | 0.13 |
| 578 | 25.1 | 0.11 |
| TT-BPA | 380 | 8.9 | 0.49 |
| 435 | 37.7 | 0.03 |
| 578 | 25.1 | 0.02 |

REFERENCES

[1] W.-K. Han, H.-S. Lu, J.-X. Fu, X. Liu, X. Zhu, X. Yan, J. Zhang, Y. Jiang, H. Dong, Z.-G. Gu. Targeted construction of a three-dimensional metal covalent organic framework with spn topology for photocatalytic hydrogen peroxide production, Chem. Eng. J. 449 (2022) 137802. http://doi.org/10.1016/j.cej.2022.137802.

[2] M. Kou, Y. Wang, Y. Xu, L. Ye, Y. Huang, B. Jia, H. Li, J. Ren, Y. Deng, J. Chen, Y. Zhou, K. Lei, L. Wang, W. Liu, H. Huang, T. Ma. Molecularly Engineered Covalent Organic Frameworks for Hydrogen Peroxide Photosynthesis, Angew. Chem. Int. Ed. 61 (2022) e202200413. http://doi.org/10.1002/anie.202200413.

[3] C.-Q. Han, J.-X. Guo, L. Wang, S. Sun, J. Lv, X. Sun, H. Hu, X. Huang, X.-Y. Liu. Linker engineering of benzothiadiazole and its derivative-based covalent organic frameworks for efficient photocatalytic oxidative amine coupling and hydrogen peroxide generation, J. Mater. Chem. C. 12 (2024) 16059-16066. http://doi.org/10.1039/d5qi00417a.

[4] Q. Liao, Q. Sun, H. Xu, Y. Wang, Y. Xu, Z. Li, J. Hu, D. Wang, H. Li, K. Xi. Regulating relative nitrogen locations of diazine functionalized covalent organic frameworks for overall H2O2 photosynthesis, Angew. Chem. Int. Ed. 135 (2023) e202310556. http://doi.org/10.1002/anie.202310556.

[5] P. Das, J. Roeser, A. Thomas. Solar light driven H2O2 production and selective oxidations using a covalent organic framework photocatalyst prepared by a multicomponent reaction, Angew. Chem. Int. Ed. 135 (2023) e202304349. http://doi.org/10.1002/anie.202304349.

[6] H. Hu, Y. Tao, D. Wang, C. Li, Q. Jiang, Y. Shi, J. Wang, J. Qin, S. Zhou, Y. Kong. Rational modification of hydroxy-functionalized covalent organic frameworks for enhanced photocatalytic hydrogen peroxide evolution, J. Colloid Interface Sci. 629 (2023) 750-762. http://doi.org/ 10.1016/j.jcis.2022.09.111.

[7] S. Chai, X. Chen, X. Zhang, Y. Fang, R.S. Sprick, X. Chen. Rational design of covalent organic frameworks for efficient photocatalytic hydrogen peroxide production, Environ. Sci.-Nano. 9 (2022) 2464-2469. http://doi.org/10.1039/d2en00135g.

[8] M. Deng, J. Sun, A. Laemont, C. Liu, L. Wang, L. Bourda, J. Chakraborty, K. Van Hecke, R. Morent, N. De Geyter. Extending the π-conjugation system of covalent organic frameworks for more efficient photocatalytic H2O2 production, Green Chem. 25 (2023) 3069-3076. http://doi.org/10.1039/d2gc04459e.

[9] D. Chen, W. Chen, Y. Wu, L. Wang, X. Wu, H. Xu, L. Chen. Covalent organic frameworks containing dual O2 reduction centers for overall photosynthetic hydrogen peroxide production, Angew. Chem. Int. Ed. 62 (2023) e202217479. http://doi.org/10.1002/anie.202217479.

[10] Y. Yang, J. Kang, Y. Li, J. Liang, J. Liang, L. Jiang, D. Chen, J. He, Y. Chen, J. Wang. Enhanced photocatalytic hydrogen peroxide production activity of imine-linked covalent organic frameworks via modification with functional groups, New J. Chem. 46 (2022) 21605-21614. http://doi.org/10.1039/d2nj03744k.

[11] Z. Zhang, Q. Zhang, Y. Hou, J. Li, S. Zhu, H. Xia, H. Yue, X. Liu. Tris (triazolo) triazine‐Based Covalent Organic Frameworks for Efficiently Photocatalytic Hydrogen Peroxide Production, Angew. Chem. Int. Ed. 63 (2024) e202411546. http://doi.org/10.1002/anie.202411546.

[12] F. Tan, Y. Zheng, Z. Zhou, H. Wang, X. Dong, J. Yang, Z. Ou, H. Qi, W. Liu, Z. Zheng. Aqueous synthesis of covalent organic frameworks as photocatalysts for hydrogen peroxide production, CCS Chem. 4 (2022) 3751-3761. http://doi.org/10.31635/ccschem.022.202101578.

[13] Y. Luo, B. Zhang, C. Liu, D. Xia, X. Ou, Y. Cai, Y. Zhou, J. Jiang, B. Han. Sulfone‐modified covalent organic frameworks enabling efficient photocatalytic hydrogen peroxide generation via one‐step two‐electron O2 reduction, Angew. Chem. Int. Ed. 62 (2023) e202305355. http://doi.org/10.1002/ange.202305355.

[14] Y. Liu, W.-K. Han, W. Chi, Y. Mao, Y. Jiang, X. Yan, Z.-G. Gu. Substoichiometric covalent organic frameworks with uncondensed aldehyde for highly efficient hydrogen peroxide photosynthesis in pure water, Appl. Catal. B: Environ. 331 (2023) 122691. https://doi.org/10.1016/j.apcatb.2023.122691.
